# Supplementary material for: Hydraulic trait trade-offs shape ecosystem productivity, water-use efficiency, and stability across aridity gradients in the Mongolian Plateau
Source: Research Square preprint supplement (doi:10.21203/rs.3.rs-8121146/v1), 2025-11-18
Supplement: Supplementary file 1 [file 2561104d80bddc54daad851e.docx]

**Supplementary Information for**

**Hydraulic trait trade-offs shape ecosystem productivity, water-use efficiency, and stability across aridity gradients in the Mongolian Plateau**

**Xinlei Guo1,2, #, Xu Wang3#, Chengzhen Jia4, Tao Liu1,2, Zhiyong Li1,2, Huamin Liu1,2, Lixin Wang1,2, Yang Wang5, Lei Dong6, Cunzhu Liang1,2, Jinghui Zhang1,2***

**Affiliations**

1Ministry of Education Key Laboratory of Ecology and Resource Use of the Mongolian Plateau & Inner Mongolia Key Laboratory of Grassland Ecology and the Candidate State Key Laboratory of Ministry of Science and Technology & Observation and Research Station for the Typical Steppe Ecosystem of the Ministry of Education, Hohhot, China;

2School of Ecology and Environment, Inner Mongolia University, Hohhot, China;

3State Key Laboratory of Herbage Improvement and Grassland Agro-ecosystems, College of Ecology, Lanzhou University, Lanzhou, China

4Inner Mongolia Institute of Meteorological Sciences, Hohhot, China;

5College of Life Science and Technology, Inner Mongolia Normal University, Hohhot, China;

6Institute of Water Resources for Pastoral Areas, Ministry of Water Resources, Hohhot, China

#These authors contributed equally to this work

*Corresponding author: Jinghui Zhang, Email: jhzhang1001@126.com.

**This file includes:**

Supplementary Figures 1-3

**Supplementary Figures**





**Supplementary Fig 1.** Linear relationships between community-level hydraulic traits and AGB across the Mongolian Plateau.Relationships between AGB and hydraulic traits: **a** Kleaf,maximum leaf hydraulic conductance ; **b** P50,xylem pressure at 50% loss of hydraulic conductivity; **c** Ψpre,predawn leaf water potential ; **d** P88,xylem pressure at 88% loss of hydraulic conductivity; e Ψsat,osmotic potential at full turgor; f RS, relative symplastic water content; g Cleaf,leaf water capacitance ; h OA,osmotic adjustment . Solid lines indicate fitted linear regressions with 95% confidence intervals (shaded areas). Points represent community means per site.





**Supplementary Fig 2.** Linear relationships between community-level hydraulic traits and AGB across the Mongolian Plateau.Relationships between δ¹³C and hydraulic traits: **a** Kleaf,maximum leaf hydraulic conductance ; **b** P50,xylem pressure at 50% loss of hydraulic conductivity; **c** Ψpre,predawn leaf water potential ; **d** P88,xylem pressure at 88% loss of hydraulic conductivity; e Ψsat,osmotic potential at full turgor; f RS, relative symplastic water content; g Cleaf,leaf water capacitance ; h OA,osmotic adjustment . Solid lines indicate fitted linear regressions with 95% confidence intervals (shaded areas). Points represent community means per site.





**Supplementary Fig 3.** Linear relationships between community-level hydraulic traits and ecosystem stability across the Mongolian Plateau.Relationships between ecosystem stability and hydraulic traits: **a** Kleaf,maximum leaf hydraulic conductance ; **b** P50,xylem pressure at 50% loss of hydraulic conductivity; **c** Ψpre,predawn leaf water potential ; **d** P88,xylem pressure at 88% loss of hydraulic conductivity; e Ψsat,osmotic potential at full turgor; f RS, relative symplastic water content; g Cleaf,leaf water capacitance ; h OA,osmotic adjustment . Solid lines indicate fitted linear regressions with 95% confidence intervals (shaded areas). Points represent community means per site.
